# Supplementary material for: X-ray photoelectron spectroscopy study of lithium thio-germanate thin films
Source: Royal Society of Chemistry journal article supplement (doi:10.1039/c1ra00165e), 2011-01-01
Supplement: c1ra00165e.pdf [file c1ra00165e.pdf]

# Supporting Information

## X-ray photoelectron spectroscopy study of lithium thio-germanate thin films

Inseok Seo, and Steve W. Martin\*

Department of Materials Science and Engineering, Iowa State University,

2220 Hoover Hall, Ames, Iowa 50011, USA

Author to whom correspondence should be directed

Phone : (515) 294-0745, FAX : (515) 294-5444

E-mail : [swmartin@iastate.edu](mailto:swmartin@iastate.edu)

### Supporting Information Available:

This material is available free of charge via the Internet at <http://rsc.org>. or contact directly to authors at [swmartin@iastate.edu](mailto:swmartin@iastate.edu)

1. XPS spectra of the  $\text{Li}_4\text{GeS}_4$  thin-film grown in Ar atmosphere without and with Ar etching for 1 min. and 5 min. (**Figure S1**)

2. XPS spectra of the  $\text{Li}_6\text{GeS}_5$  thin film grown in Ar atmosphere without and with Ar etching for 1 min. and 5 min. (**Figure S2**)

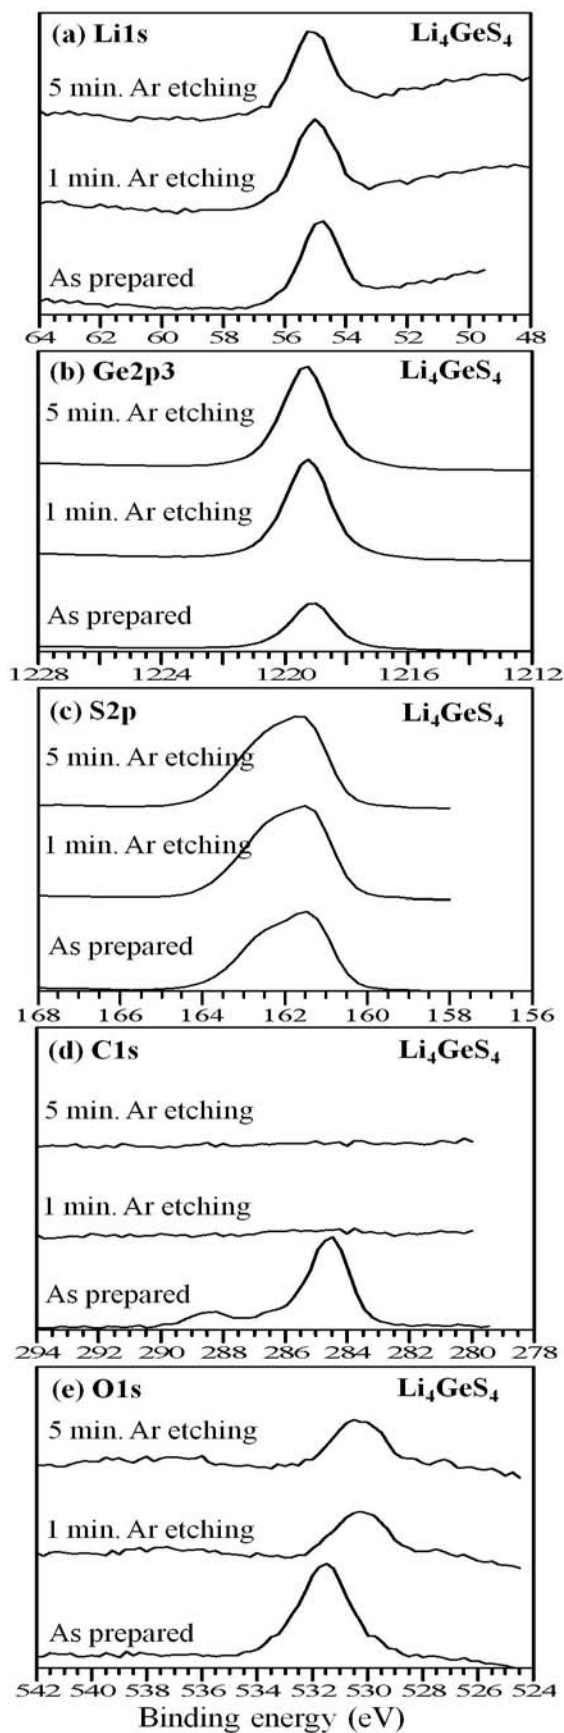

Figure S1.

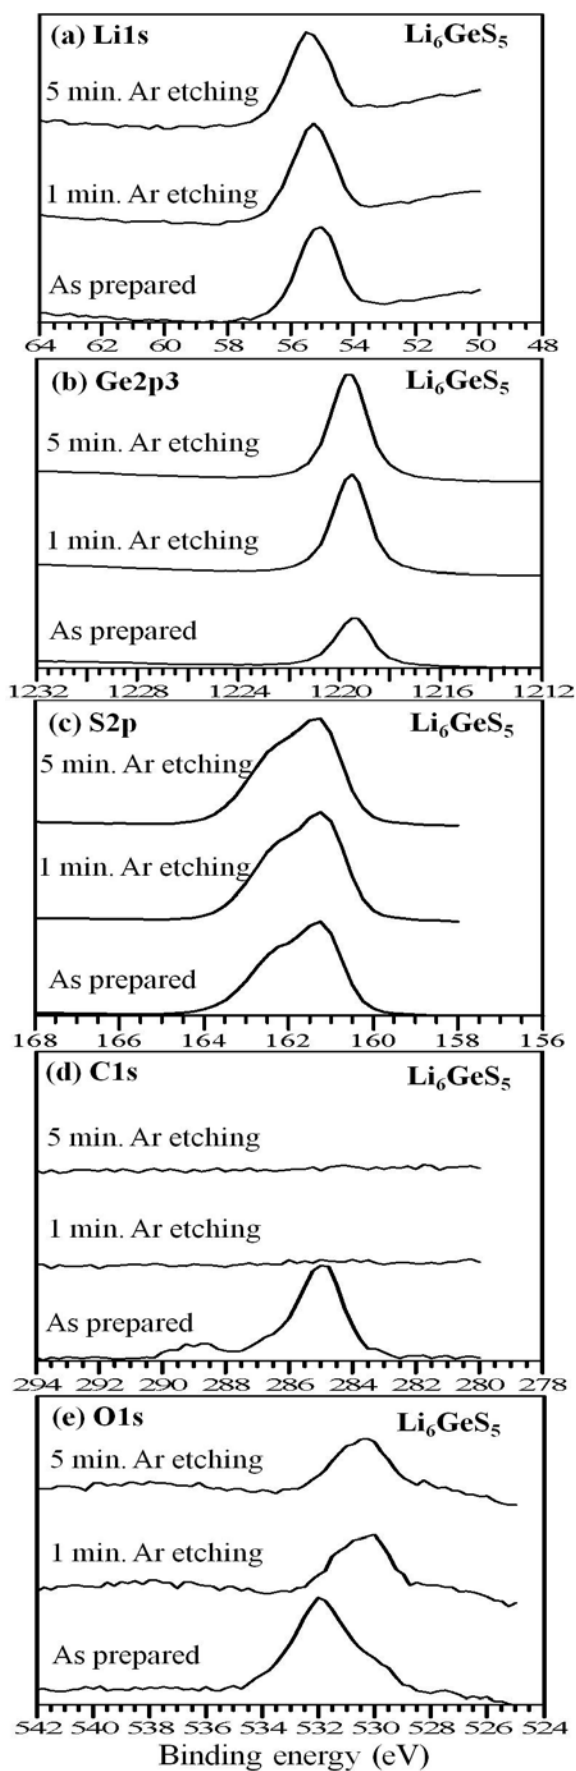

Figure S2.
